## Hyperoxia and Antioxidants for Myocardial Injury in Noncardiac Surgery: A $2 \times 2$ Factorial, Blinded, Randomized Clinical Trial: Erratum

In the Appendix (page 419) listing the VIXIE Trial Group Collaborators, Emilie Kongebro, M.D. was erroneously left off the list. The sentence “The following VIXIE Trial Group collaborators do not meet all authorship criteria but contributed substantially to the work reported in the article: research nurse Marlene Sogaard, R.N., research assistant Zacharias D. Holm, M.B., and research fellow Sine A.N. Eriksen, R.N. contributed as investigators to the inclusion of 376 patients at Department of Anaesthesia and Intensive Care, Bispebjerg and Frederiksberg Hospital, University of Copenhagen, Denmark” should be changed to “The following VIXIE Trial Group collaborators do not meet all authorship criteria but contributed substantially to the work reported in the article: research nurse Marlene Sogaard, R.N., research fellow Emilie K. Kongebro, M.D., research assistant Zacharias D. Holm, M.B., and research fellow Sine A.N. Eriksen, R.N. contributed as investigators to the inclusion of 376 patients at Department of Anaesthesia and Intensive Care, Bispebjerg and Frederiksberg Hospital, University of Copenhagen, Denmark.”

The authors regret this error. The online version and PDF of the article have been corrected.

DOI: 10.1097/ALN.0000000000004289

### Reference

Holse C, Aasvang EK, Vester-Andersen M, Rasmussen LS, Wetterslev J, Christensen R, Jorgensen LN, Pedersen SS, Loft FC, Troensegaard H, Mørkenborg ML, Stisen ZR, Rünitz K, Eiberg JP, Hansted AK, Meyhoff CS; VIXIE Trial Group: Hyperoxia and antioxidants for myocardial injury in noncardiac surgery: A  $2 \times 2$  factorial, blinded, randomized clinical trial. *ANESTHESIOLOGY* 136:408–19
